# Supplementary material for: Regulation of S-formylglutathione hydrolase by the anti-aging gene klotho
Source: PubMed Central journal article supplement (PMC5687603; doi:10.18632/oncotarget.19111), 2017-07-08
Supplement: oncotarget-08-88259-s001.pdf [file oncotarget-08-88259-s001.pdf]

## Regulation of S-formylglutathione hydrolase by the anti-aging gene klotho

### SUPPLEMENTARY MATERIALS

#### Supplementary Table 1: Oligonucleotide sequences of Skl and FGH siRNA

##### Sk1 clone

Sk15 5' -ACCATTGACAACCCCTACGTGG  
 Sk13 5' -TTTCTAGAGTGAGGAAGCAAGAGGCCGACACTGGGTTTTGTCAAAGGACTTACTTGAACGTAGTTGTCAACAACCTCC  
 F6H5 5' -CTAGAGATTATAAAGATGATGATGATAAAGGCAGCAGCCATCATCATCATCACTAAA  
 F6H3 5' -AGCTTTTAGTGATGATGATGATGATGGCTGCTGCCTTTATCATCATCATCTTTATAATCT

##### FGH KO siRNA

|        |                              |                             |
|--------|------------------------------|-----------------------------|
| SiFGH1 | 5' -GCUGCAAUUAUUAAGGUGAdTdT  | 5' -UCACCUUUAAUUAUGCAGCdTdT |
| SiFGH2 | 5' -CCUUGUGAAAUCCUAUCCAdTdT  | 5' -UGGAUAGGAUUUCACAAGGdTdT |
| SiFGH3 | 5' -CAACCUUUAAUACUGACCAAdTdT | 5' -UGGUCAGUAAUUAAGGUUGdTdT |
